# Supplementary material
Source: PubMed Central journal article supplement (PMC8050117)

A

| Predicted Upstream Regulator | Molecule Type                     | Predicted Activation State | Activation z-score | p-value of overlap |
|------------------------------|-----------------------------------|----------------------------|--------------------|--------------------|
| <i>MYOCD</i>                 | transcription regulator           | Activated                  | 2.921              | 0.000000902        |
| <i>HAND2</i>                 | transcription regulator           | Activated                  | 2.587              | 0.00000517         |
| <i>GATA4</i>                 | transcription regulator           | Activated                  | 2.585              | 0.0000177          |
| <i>TBX5</i>                  | transcription regulator           | Activated                  | 2.585              | 0.00000517         |
| <i>HIF1A</i>                 | transcription regulator           |                            | 1.372              | 0.00173            |
| <i>NANOG</i>                 | transcription regulator           |                            | 1                  | 0.0313             |
| <i>SATB1</i>                 | transcription regulator           |                            | 1                  | 0.00873            |
| <i>ESR1</i>                  | ligand-dependent nuclear receptor |                            | 0.788              | 0.00000524         |
| <i>WT1</i>                   | transcription regulator           |                            | 0.728              | 0.000263           |
| <i>POU5F1</i>                | transcription regulator           |                            | 0.668              | 0.00417            |

B

## Analysis of HDGF targets from ENCODE project

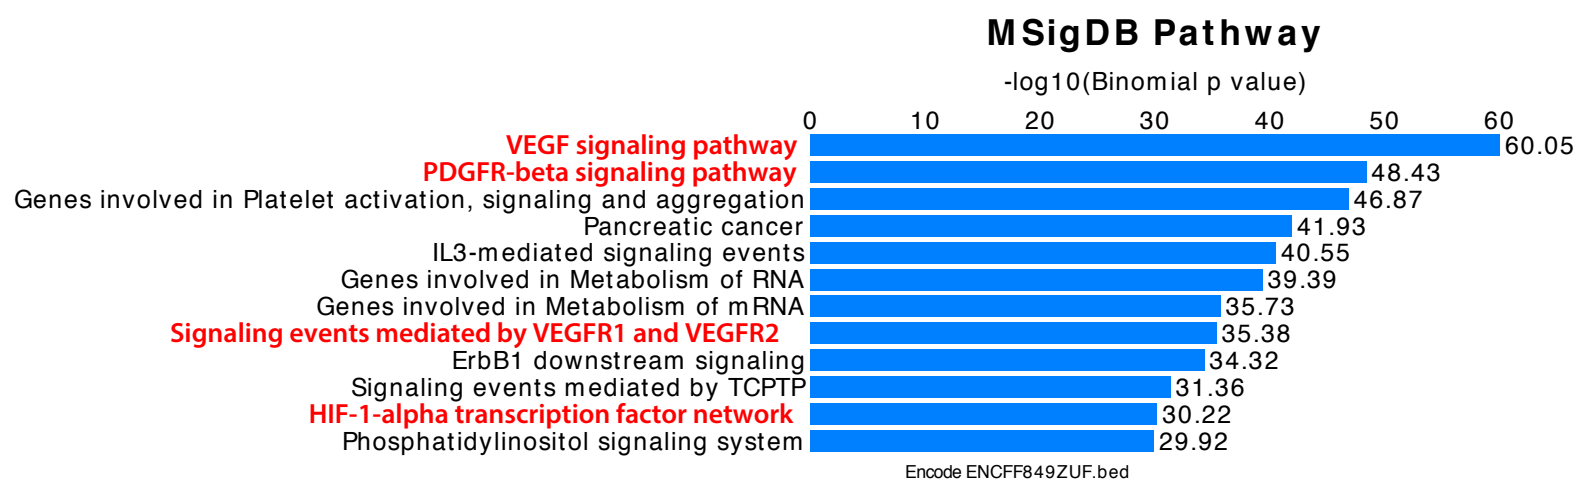

C

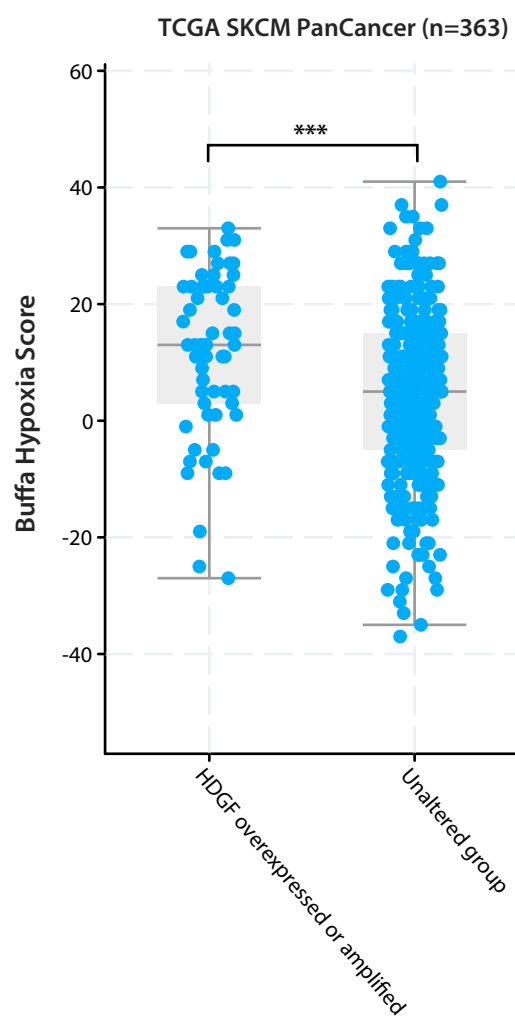

D

Pooled vector injection in casper *kdrl:mCherry*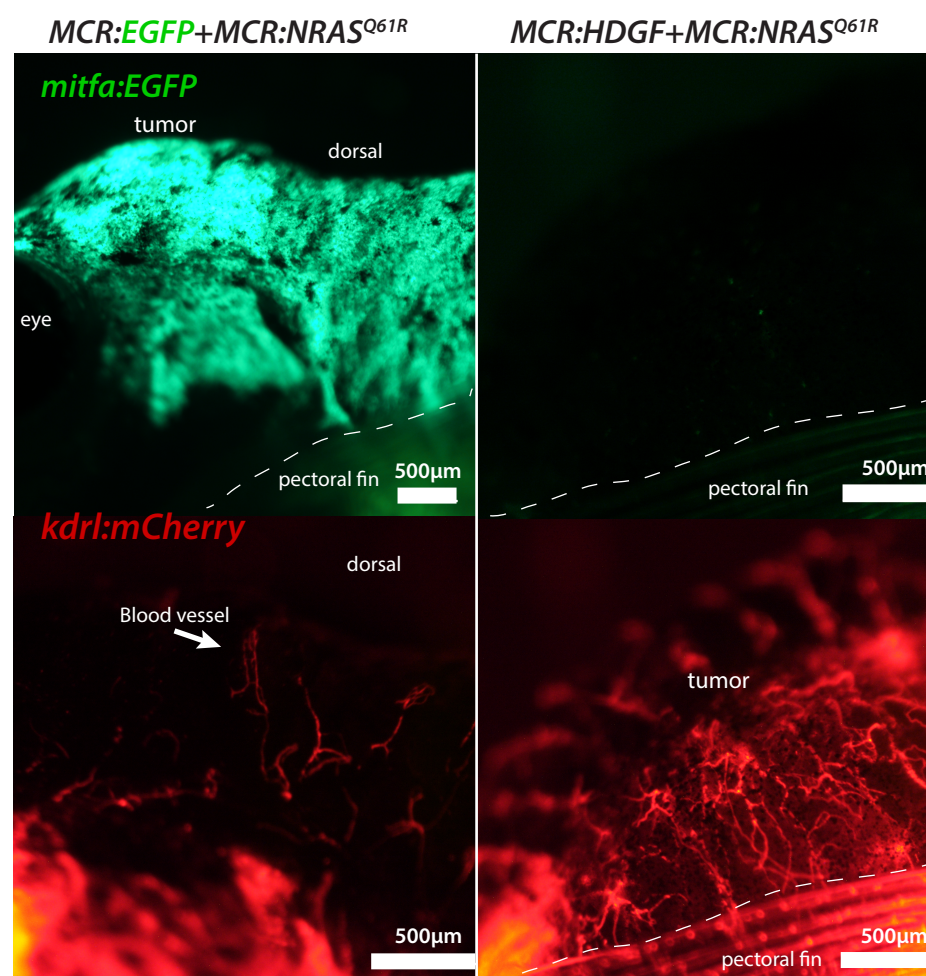

Supplement: NIHMS1683752-supplement-Fig_3.pdf [file NIHMS1683752-supplement-Fig_3.pdf]
