# Supplementary material
Source: PubMed Central journal article supplement (PMC8050117)

A

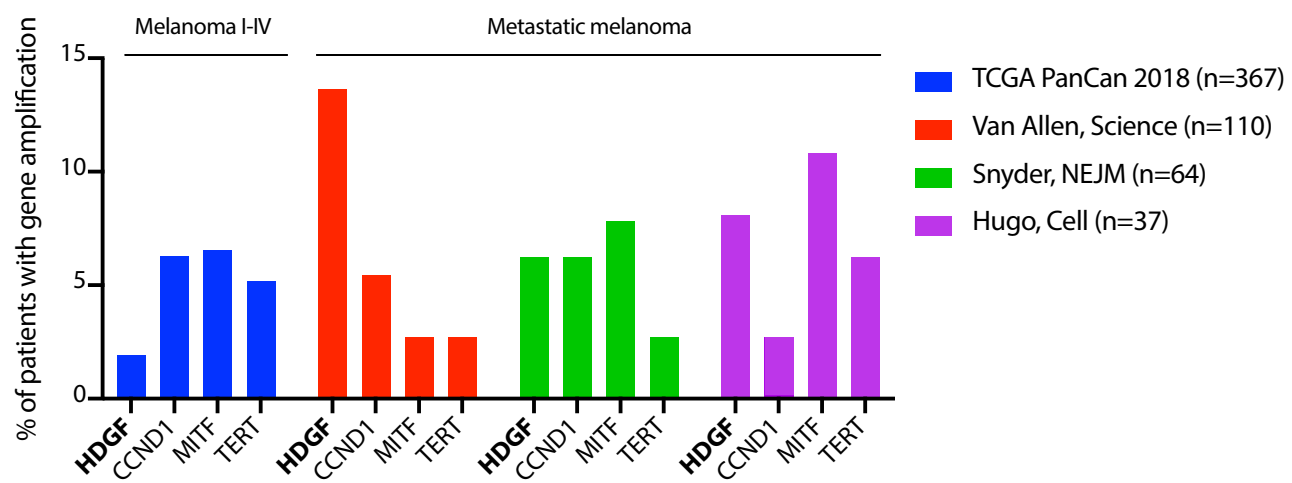

D

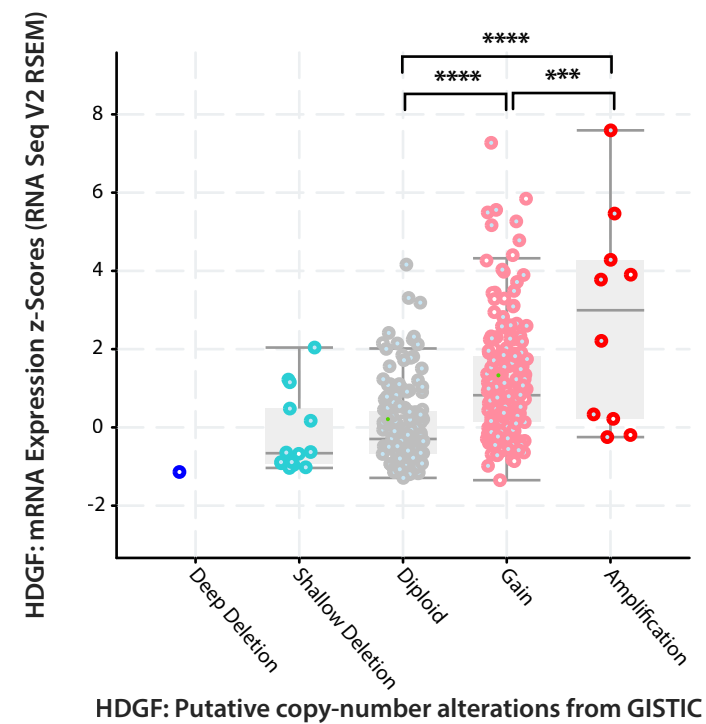

B

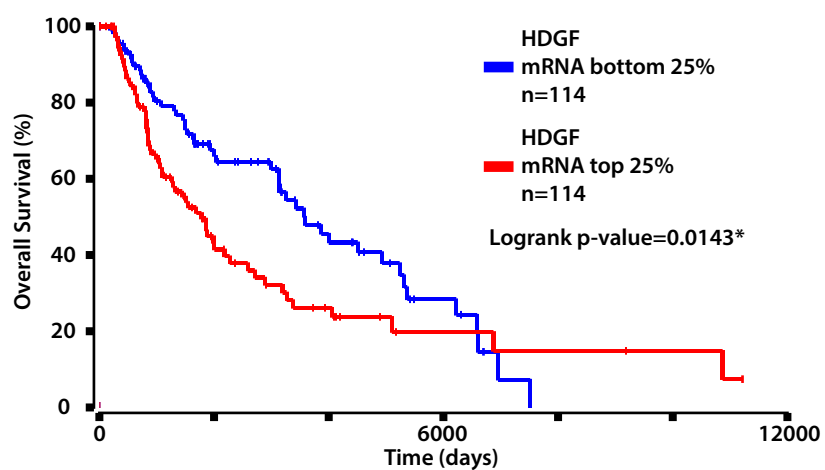

C

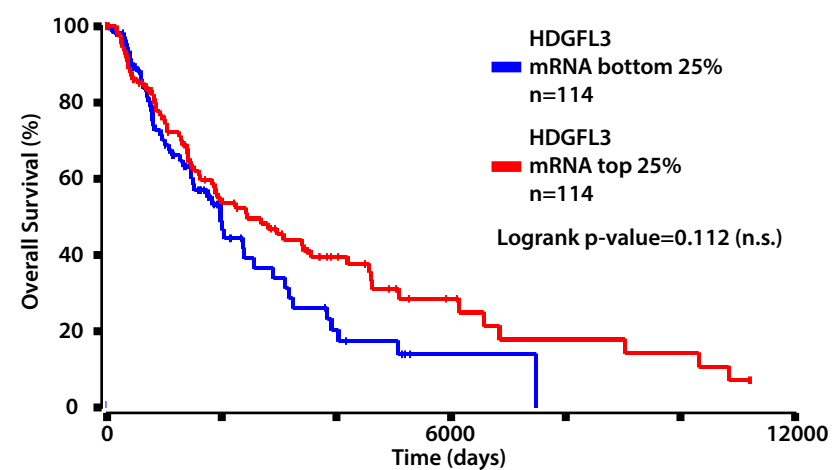

Single cell RNA-seq of metastatic melanoma Tirosh et al.

E

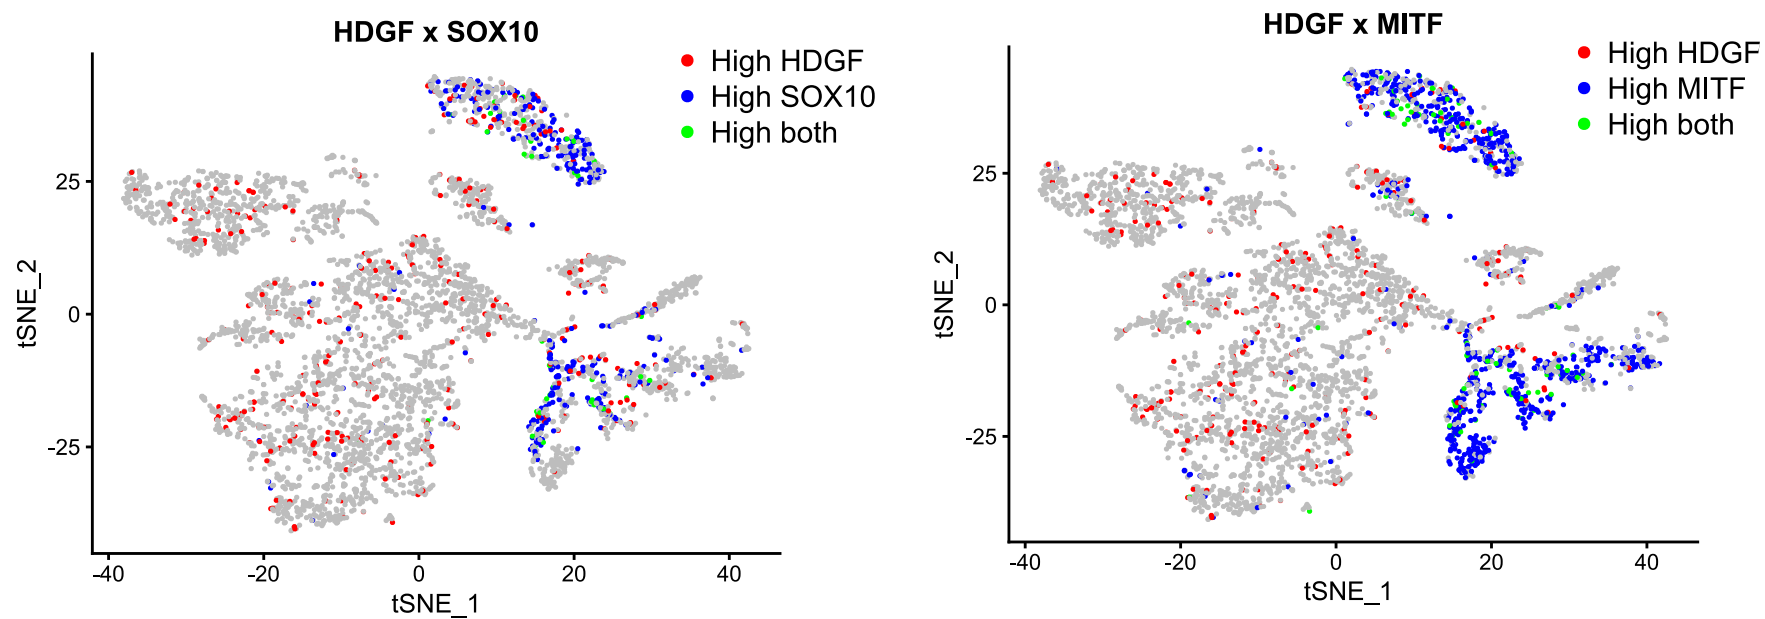

Supplement: NIHMS1683752-supplement-Fig_1.pdf [file NIHMS1683752-supplement-Fig_1.pdf]

A

TCGA SKCM Pan Cancer Atlas (n=363)

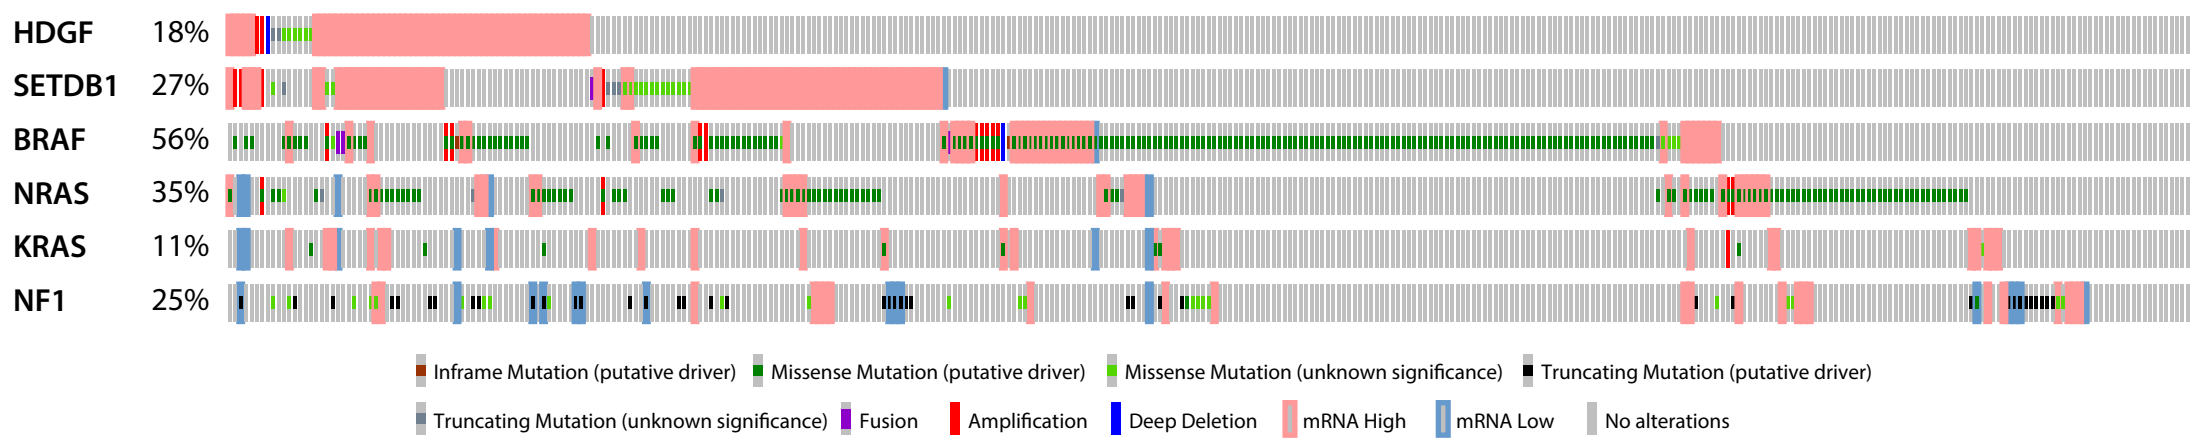

B

Van Allen et al. 2015 - Metastatic melanoma (n=110)

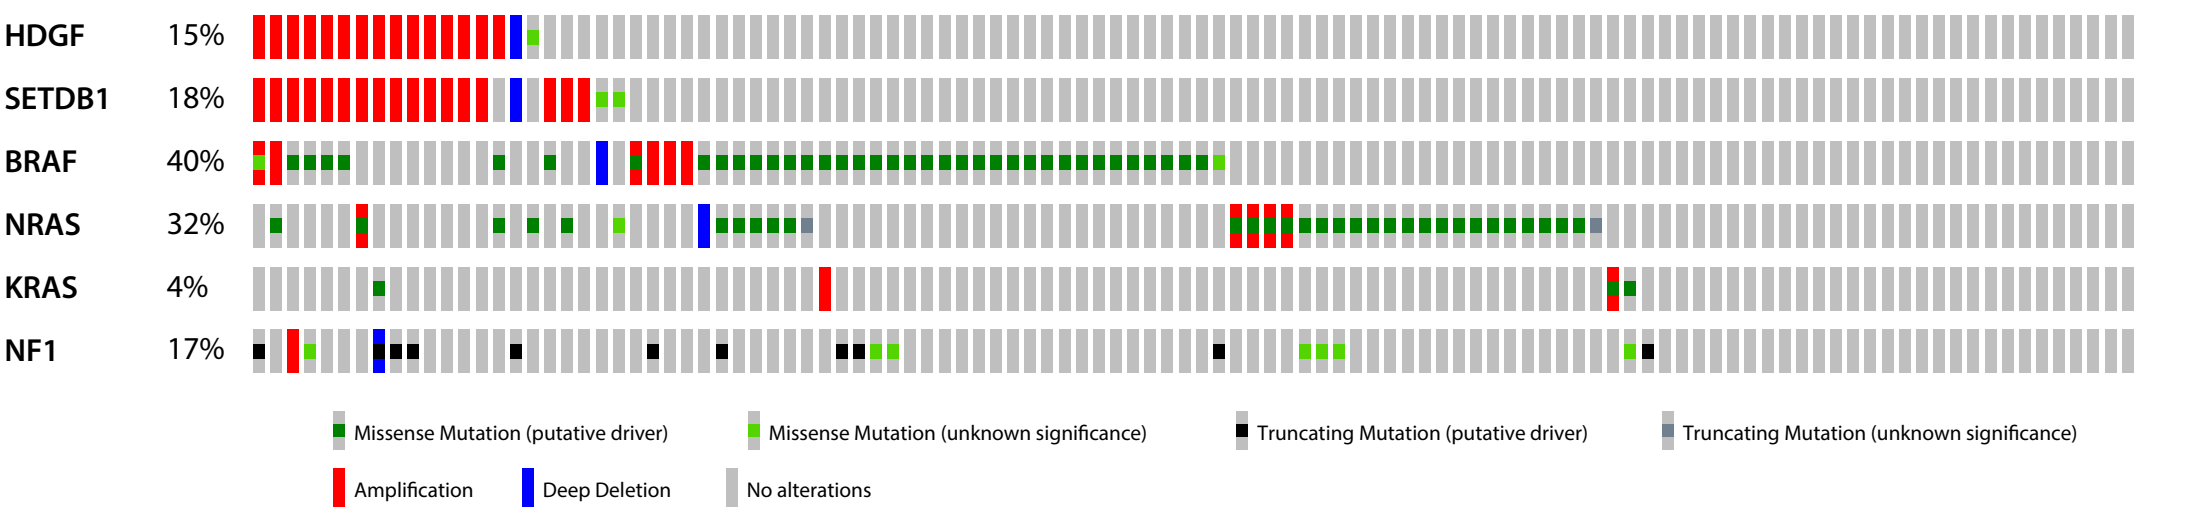

Supplement: NIHMS1683752-supplement-Fig_2.pdf [file NIHMS1683752-supplement-Fig_2.pdf]

A

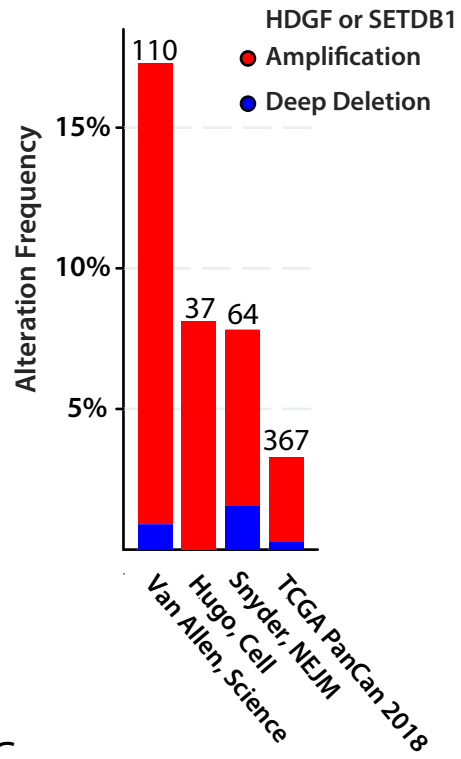

B

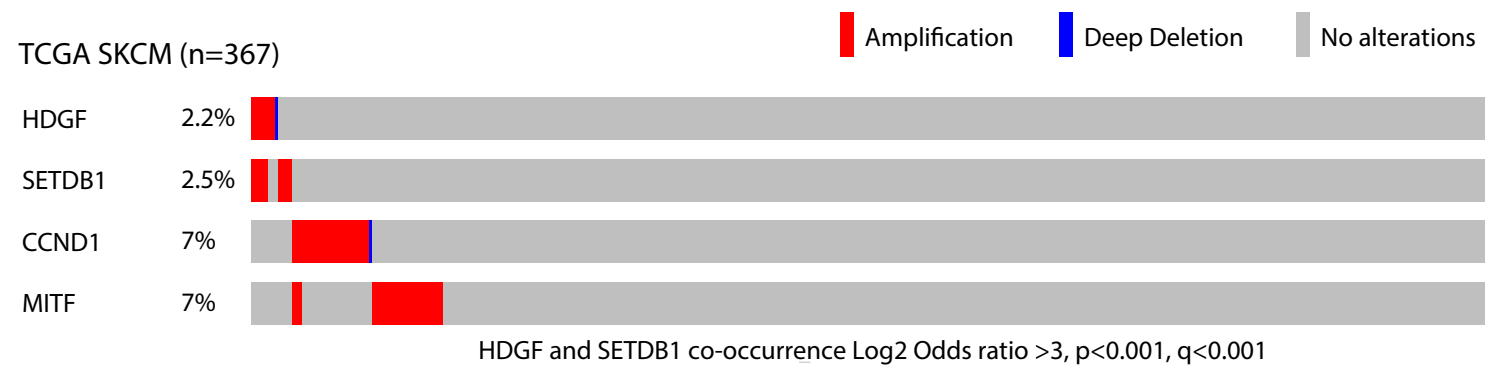

C

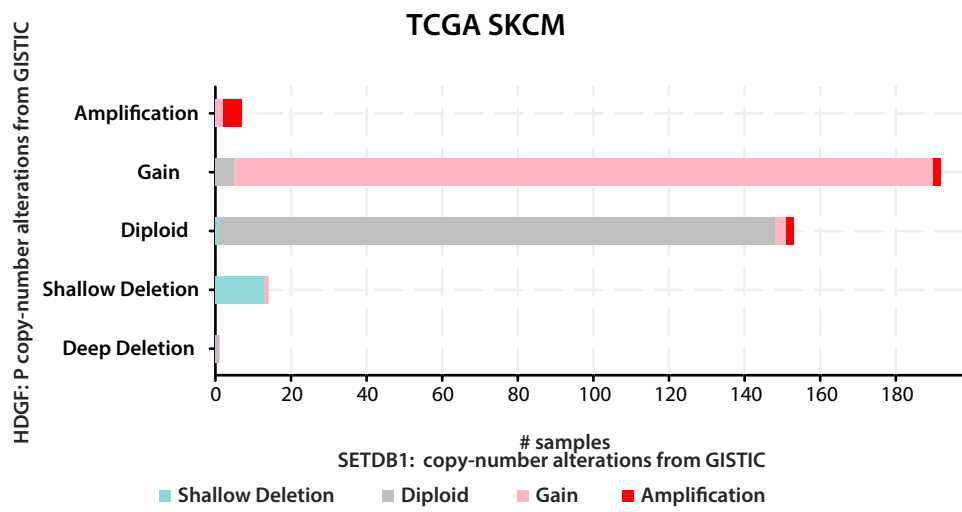

D

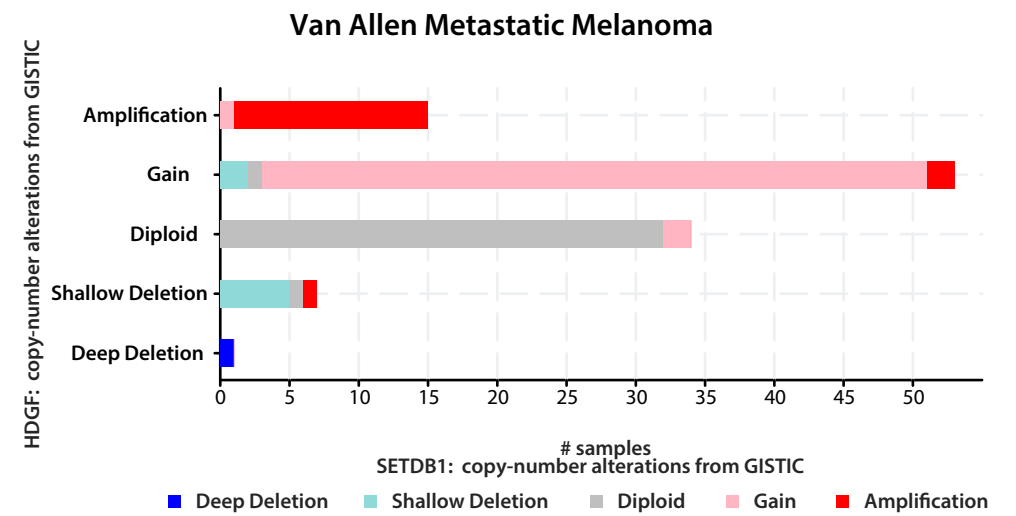

E

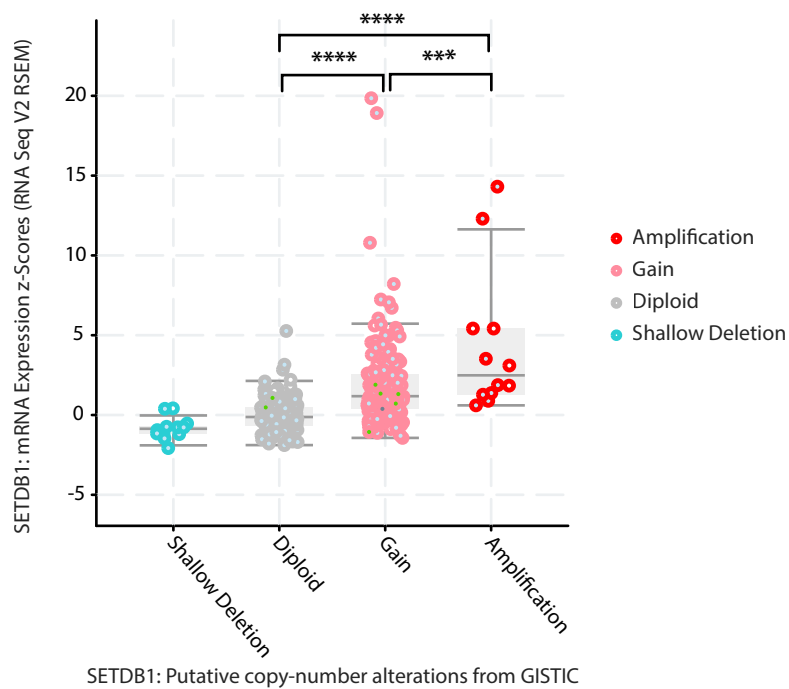

F

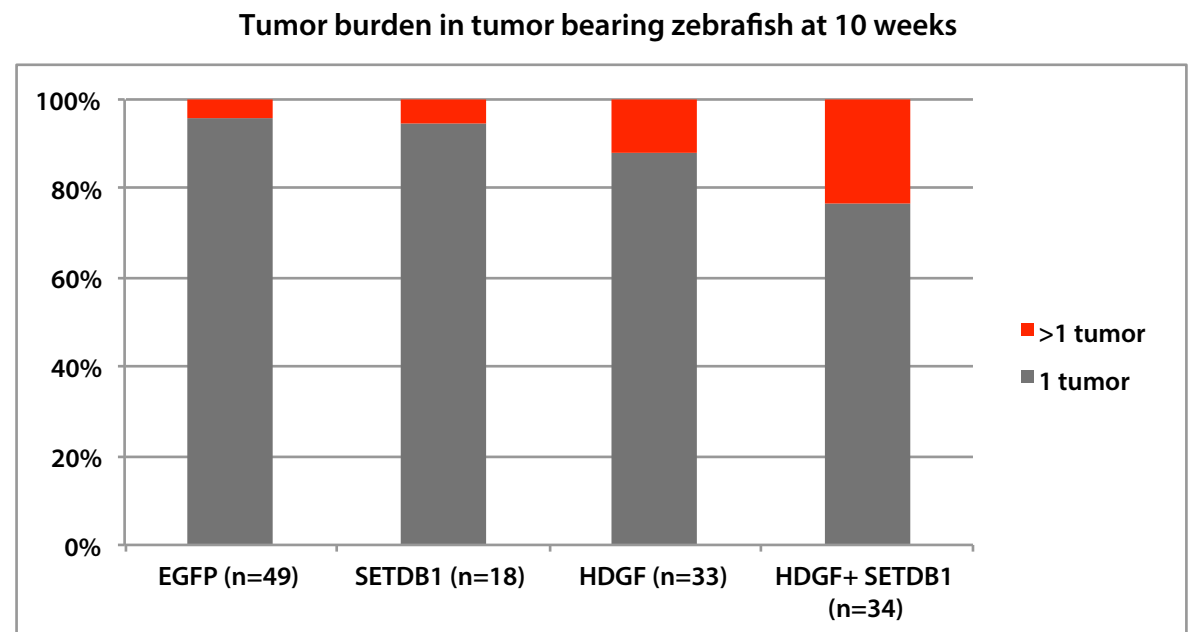

Supplement: NIHMS1683752-supplement-Fig_4.pdf [file NIHMS1683752-supplement-Fig_4.pdf]
